# Supplementary material
Source: PubMed Central journal article supplement (PMC3594069)
Supplement: NIHMS431384-supplement-Supp_Table_S1-S3.pdf [file NIHMS431384-supplement-Supp_Table_S1-S3.pdf]

**Table S1.** Forward and reverse primers used in PCR amplification of 11 regions of the 60-kb segment

| <b>Primer name</b> | <b>Region amplified (see Fig. 1--2)</b> | <b>Primer sequence</b>                 |
|--------------------|-----------------------------------------|----------------------------------------|
| Naeg1458F          | 1458-2384                               | AAC TGT GAC TTC TTG CGC TTC            |
| Naeg2384R          | 1458-2384                               | TCT TCC GTG GTA ATT CTA CCG            |
| Naeg2329F          | 2329-3459                               | CAT CCA TTA ATT GAT AAT TGC<br>AAT GAC |
| Naeg3459R          | 2329-3459                               | TGA AAG TAA TTC CTC GAG TTG<br>TTC     |
| Naeg15278F         | 15278-16455                             | TTA TGC ATG AGT TGA AAG TGA<br>GCC     |
| Naeg16455R         | 15278-16455                             | GGG TTG GGA TCT AAA TAG GC             |
| Naeg16411F         | 16411-17445                             | GAC CAC TCT TGA GGA TTG AGC            |
| Naeg17445R         | 16411-17445                             | GAC ATC ATC ACC ACG AAA CGG            |
| Naeg25036F         | 25036-26108                             | AGA AGC GAG TTA AAT GTT TCC G          |
| Naeg26108R         | 25036-26108                             | GCT CAT TGG TTT GGG TTT ACC            |
| Naeg28285F         | 28285-29371                             | TGG TCA CAA GAT CTC TCG TGG            |
| Naeg29371R         | 28285-29371                             | GTC AAG GAA CGA ACG TTT CC             |
| Naeg35101F         | 35101-36316                             | AGC TGT CAA TGC GAG TTT CC             |
| Naeg36316R         | 35101-36316                             | CTA CGA CAT TAT TCT TAC TGA<br>TCC     |
| Naeg39275F         | 39275-40281                             | TAT CTC GCA ACT CTT TCA ACA G          |
| Naeg40281R         | 39275-40281                             | GAT AAA TCC ATG ACA ATT GTT<br>ATA ACC |
| Naeg42890F         | 42890-43997                             | CGA GTA ATG AGC AAT CGC C              |
| Naeg43997R         | 42890-43997                             | TGT ATC AAA ATC AAT ATC TCC<br>TCC     |
| Naeg47294F         | 47294-48323                             | ATA CAG TGG AAT CAT AGA GTC C          |
| Naeg48323R         | 47294-48323                             | CAA AAT ATT GAC AGA CTG AAA<br>ATG C   |
| Naeg52899F         | 52899-53976                             | GGA AGA AGA TGT TGT TTA ATG<br>ATG G   |
| Naeg53976R         | 52899-53976                             | ACT TGA CAA GAA TTT GAG TTG CC         |

**Table S2.** *N. fowleri* mitochondrial genome annotation based on BLAST searching and RNA scanning software

| Annotation | Gene name                     | <i>N. gruberi</i> homologue <sup>1</sup> | Start ( <i>fowleri/gruberi</i> ) | End ( <i>fowleri/gruberi</i> ) | <i>N. fowleri</i> length (bp) | <i>N. gruberi</i> length (bp) | <i>Nf/Ng</i> % length | E-value <sup>2</sup> | Identities (%) <sup>2</sup> | Cove  | Score (rRNA) |
|------------|-------------------------------|------------------------------------------|----------------------------------|--------------------------------|-------------------------------|-------------------------------|-----------------------|----------------------|-----------------------------|-------|--------------|
| Rnl        | Large subunit rRNA            | NC_002573                                | 1/1                              | 2694/2573                      | 2694                          | 2573                          | 121                   | N/A                  | 85                          | N/A   | 741.8        |
| Asn tRNA   | Asparagine tRNA               | NC_002573                                | 2710/2698                        | 2781/2769                      | 72                            | 71                            | 101                   | N/A                  | 100                         | 74.86 | N/A          |
| Nad1       | NADH dehydrogenase subunit 1  | NP_066498                                | 2810/2802                        | 3787/3785                      | 978                           | 984                           | 99                    | 0                    | 85                          | N/A   | N/A          |
| Rps7       | Ribosomal protein S7          | NP_066499                                | 3788/3796                        | 4942/5019                      | 1155                          | 1224                          | 94                    | 1.00E-84             | 47                          | N/A   | N/A          |
| Phe tRNA   | Phenylalanine tRNA            | NC_002573                                | 5093/5116                        | 5163/5186                      | 71                            | 71                            | 100                   | N/A                  | 99                          | 56.34 | N/A          |
| ATP1       | ATP synthase F1 subunit alpha | NP_066500                                | 5250/5259                        | 6902/6911                      | 1653                          | 1653                          | 100                   | 0.00E+00             | 94                          | N/A   | N/A          |
| Orf312     | Orf312                        | NP_066501                                | 6963/6973                        | 7697/7911                      | 735                           | 939                           | 78                    | 2.00E-08             | 60                          | N/A   | N/A          |
| His tRNA   | Histidine tRNA                | NC_002573                                | 7713/7936                        | 7783/8006                      | 71                            | 71                            | 100                   | N/A                  | 90                          | 62.61 | N/A          |
| Nad4L      | NADH dehydrogenase subunit 4L | NP_066502                                | 7811/8038                        | 8071/8301                      | 261                           | 264                           | 99                    | 6.00E-51             | 92                          | N/A   | N/A          |
| Met tRNA   | Methionine tRNA               | NC_002573                                | 8090/8319                        | 8162/8390                      | 73                            | 72                            | 101                   | N/A                  | 93                          | 67.24 | N/A          |
| Phe tRNA   | Phenylalanine                 | NC_002573                                | 8182/8406                        | 8252/8476                      | 71                            | 71                            | 100                   | N/A                  | 100                         | 58.04 | N/A          |

|          |                                          |           |             |             |      |      |     |               |     |       |     |
|----------|------------------------------------------|-----------|-------------|-------------|------|------|-----|---------------|-----|-------|-----|
|          | tRNA                                     |           |             |             |      |      |     |               |     |       |     |
| Orf164   | Orf 164                                  | NP_066503 | 8414/8637   | 8899/9131   | 486  | 495  | 98  | 2.00E<br>-27  | 37  | N/A   | N/A |
| Rps12    | Ribosomal<br>protein S12                 | NP_066504 | 8902/9135   | 9288/9521   | 387  | 387  | 100 | 5.00E<br>-75  | 88  | N/A   | N/A |
| Gln tRNA | Glutamine<br>tRNA                        | NC_002573 | 9289/9537   | 9359/9607   | 71   | 71   | 100 | N/A           | 89  | 75.47 | N/A |
| Cox1     | Cytochrome c<br>oxidase subunit<br>1     | NP_066505 | 9612/9939   | 11513/11840 | 1902 | 1902 | 100 | 0.00E<br>+00  | 93  | N/A   | N/A |
| Cox11    | Haem<br>biosynthesis<br>protein          | NP_066506 | 11612/11968 | 12286/12636 | 675  | 669  | 101 | 6.00E<br>-74  | 52  | N/A   | N/A |
| Sdh2     | Succinate:cytochrome c<br>oxidoreductase | NP_066507 | 12290/12672 | 13120/13484 | 831  | 813  | 102 | 1.00E<br>-146 | 74  | N/A   | N/A |
| Nad11    | NADH<br>dehydrogenase<br>subunit 11      | NP_066508 | 13223/13573 | 15295/15660 | 2073 | 2088 | 99  | 0             | 63  | N/A   | N/A |
| Cox3     | Cytochrome c<br>oxidase subunit<br>3     | NP_066509 | 15390/15739 | 16283/16632 | 894  | 894  | 100 | 0             | 87  | N/A   | N/A |
| Trp tRNA | Tryptophan<br>tRNA                       | NC_002573 | 16282/16648 | 16352/16718 | 71   | 71   | 100 | N/A           | 100 | 72.62 | N/A |
| Pro tRNA | Proline tRNA                             | NC_002573 | 16407/16754 | 16479/16826 | 73   | 73   | 100 | N/A           | 95  | 63.59 | N/A |
| Nad8     | NADH<br>dehydrogenase<br>subunit 8       | NP_066510 | 16513/16863 | 16992/17342 | 480  | 480  | 100 | 3.00E<br>-110 | 91  | N/A   | N/A |

|        |                               |           |              |             |      |      |     |           |    |     |     |
|--------|-------------------------------|-----------|--------------|-------------|------|------|-----|-----------|----|-----|-----|
| Nad5   | NADH dehydrogenase subunit 5  | NP_066511 | 17004/17351  | 19007/19351 | 2004 | 2001 | 100 | 0         | 75 | N/A | N/A |
| Cob    | Apocytochrome b               | NP_066512 | 19074/19432  | 20525/20925 | 1452 | 1494 | 97  | 0         | 93 | N/A | N/A |
| ATP3   | ATP synthase F1 subunit gamma | NP_066513 | 21018/20997  | 21881/21863 | 864  | 867  | 100 | 1.00E-171 | 79 | N/A | N/A |
| Orf145 | Orf 145                       | NP_066514 | 21947/21927  | 22405/22364 | 459  | 438  | 105 | 3.00E-36  | 69 | N/A | N/A |
| Nad6   | NADH dehydrogenase subunit 6  | NP_066515 | 22454/22416  | 23059/23021 | 606  | 606  | 100 | 9.00E-98  | 75 | N/A | N/A |
| Rps2   | Ribosomal protein S2          | NP_066516 | 23059/23021  | 23847/23815 | 789  | 795  | 99  | 3.00E-119 | 66 | N/A | N/A |
| ATP8   | ATP synthase F0 subunit 8     | NP_066517 | 23923/23888  | 24255/24220 | 333  | 333  | 100 | 2.00E-39  | 78 | N/A | N/A |
| Rps10  | Ribosomal protein S10         | NP_066518 | <24670/24233 | 24912/24895 | 243  | 663  | 37  | 2.00E-26  | 63 | N/A | N/A |
| Rpl11  | Ribosomal protein L11         | NP_066519 | 24909/24900  | 25346/25346 | 438  | 447  | 98  | 4.00E-55  | 56 | N/A | N/A |
| Rpl2   | Ribosomal protein L2          | NP_066520 | 25386/25370  | 26186/26176 | 801  | 807  | 99  | 8.00E-133 | 69 | N/A | N/A |
| Rps19  | Ribosomal protein S19         | NP_066521 | 26188/26176  | 26451/26442 | 264  | 267  | 99  | 6.00E-17  | 43 | N/A | N/A |
| Rps3   | Ribosomal protein S3          | NP_066522 | 26457/26443  | 28004/28014 | 1548 | 1572 | 98  | 1.00E-150 | 53 | N/A | N/A |
| Rpl16  | Ribosomal                     | NP_066523 | 28006/28014  | 28431/28439 | 426  | 426  | 100 | 2.00E     | 75 | N/A | N/A |

|          |                              |           |             |             |      |      |     |           |    |       |     |
|----------|------------------------------|-----------|-------------|-------------|------|------|-----|-----------|----|-------|-----|
|          | protein L16                  |           |             |             |      |      |     | -73       |    |       |     |
| Rpl14    | Ribosomal protein L14        | NP_066524 | 28440/28445 | 28811/28816 | 372  | 372  | 100 | 2.00E-65  | 82 | N/A   | N/A |
| Rpl5     | Ribosomal protein L5         | NP_066525 | 28822/28817 | 29397/29395 | 576  | 579  | 99  | 3.00E-73  | 63 | N/A   | N/A |
| Rps14    | Ribosomal protein S14        | NP_066526 | 29397/29395 | 29693/29691 | 297  | 297  | 100 | 7.00E-31  | 56 | N/A   | N/A |
| Rps8     | Ribosomal protein S8         | NP_066527 | 29698/29704 | 30108/30129 | 411  | 426  | 96  | 1.00E-43  | 50 | N/A   | N/A |
| Rpl6     | Ribosomal protein L6         | NP_066528 | 30118/30134 | 30603/30634 | 486  | 501  | 94  | 4.00E-54  | 57 | N/A   | N/A |
| Rps11    | Ribosomal protein S11        | NP_066529 | 30604/30636 | 32274/32417 | 1671 | 1782 | 94  | 3.00E-150 | 46 | N/A   | N/A |
| Rps13    | Ribosomal protein S13        | NP_066530 | 32264/32380 | 32728/32871 | 465  | 492  | 95  | 1.00E-56  | 65 | N/A   | N/A |
| Nad4     | NADH dehydrogenase subunit 4 | NP_066531 | 32748/32889 | 34136/34313 | 1389 | 1425 | 97  | 0         | 77 | N/A   | N/A |
| YejU     | ABC transporter subunit      | NP_066532 | 34137/34318 | 34784/34950 | 648  | 633  | 102 | 5.00E-10  | 45 | N/A   | N/A |
| Nad2     | NADH dehydrogenase subunit 2 | NP_066533 | 34785/34969 | 36263/36447 | 1479 | 1479 | 100 | 9.00E-178 | 60 | N/A   | N/A |
| Ser tRNA | Serine tRNA                  | NC_002573 | 36303/36559 | 36377/36633 | 75   | 75   | 100 | N/A       | 93 | 42.59 | N/A |
| ATP6     | ATP synthase FO subunit 6    | NP_066534 | 36420/36666 | 37163/37418 | 744  | 753  | 99  | 5.00E-131 | 80 | N/A   | N/A |

|          |                                      |           |             |             |      |      |     |           |    |       |     |
|----------|--------------------------------------|-----------|-------------|-------------|------|------|-----|-----------|----|-------|-----|
| Nad3     | NADH dehydrogenase subunit 3         | NP_066535 | 37187/37443 | 37549/37805 | 363  | 323  | 100 | 7.00E-73  | 87 | N/A   | N/A |
| Cox2     | Cytochrome c oxidase subunit 2       | NP_066536 | 37689/37967 | 38546/38812 | 858  | 846  | 101 | 0         | 89 | N/A   | N/A |
| Orf504   | Orf 504                              | NP_066537 | 38636/38895 | 40219/40409 | 1584 | 1515 | 105 | 9.00E-177 | 50 | N/A   | N/A |
| Ser tRNA | Serine tRNA                          | NC_002573 | 40243/40428 | 40316/40501 | 74   | 74   | 100 | N/A       | 86 | 64.91 | N/A |
| Nad7     | NADH dehydrogenase subunit 7         | NP_066538 | 40370/40546 | 41557/41733 | 1188 | 1188 | 100 | 0         | 91 | N/A   | N/A |
| Ile tRNA | Isoleucine tRNA                      | NC_002573 | 41557/41981 | 41629/42053 | 73   | 73   | 100 | N/A       | 89 | 76.42 | N/A |
| yejR     | Haem lyase                           | NP_066539 | 41636/42054 | 43024/43478 | 1389 | 1425 | 97  | 3.00E-46  | 41 | N/A   | N/A |
| Tyr tRNA | Tyrosine tRNA                        | NC_002573 | 43056/43506 | 43138/43588 | 83   | 83   | 100 | N/A       | 90 | 73.27 | N/A |
| Ymf16    | SecY-independent transporter protein | NP_066540 | 43404/43856 | 44192/44650 | 789  | 795  | 99  | 4.00E-24  | 39 | N/A   | N/A |
| Ser tRNA | Serine tRNA                          | NC_002573 | 44210/44662 | 44283/44736 | 74   | 75   | 99  | N/A       | 91 | 55.66 | N/A |
| Leu tRNA | Leucine tRNA                         | NC_002573 | 44289/44740 | 44370/44821 | 82   | 82   | 100 | N/A       | 87 | 57.85 | N/A |
| Asp tRNA | Aspartic acid tRNA                   | NC_002573 | 44374/44824 | 44447/44896 | 74   | 73   | 101 | N/A       | 96 | 74.55 | N/A |
| Leu tRNA | Leucine tRNA                         | NC_002573 | 44555/44910 | 44535/44992 | 81   | 83   | 98  | N/A       | 95 | 61.14 | N/A |
| Rps4     | Ribosomal                            | NP_066541 | 44566/45022 | 45897/46470 | 1332 | 1449 | 92  | 1.00E     | 45 | N/A   | N/A |

|          |                              |           |             |             |      |      |     |           |    |       |       |
|----------|------------------------------|-----------|-------------|-------------|------|------|-----|-----------|----|-------|-------|
|          | protein S4                   |           |             |             |      |      |     | -78       |    |       |       |
| Met tRNA | Methionine tRNA              | NC_002573 | 45905/46495 | 45976/46566 | 72   | 72   | 100 | N/A       | 93 | 69.23 | N/A   |
| ATP9     | ATP synthase F0 subunit 9    | NP_066542 | 46047/46636 | 46265/46854 | 219  | 219  | 100 | 4.00E-45  | 99 | N/A   | N/A   |
| Lys tRNA | Lysine tRNA                  | NC_002573 | 46288/46947 | 46360/47019 | 73   | 73   | 100 | N/A       | 90 | 82.19 | N/A   |
| Met tRNA | Methionine tRNA              | NC_002573 | 46367/47022 | 46438/47093 | 72   | 72   | 100 | N/A       | 89 | 71.01 | N/A   |
| Arg tRNA | Arginine tRNA                | NC_002573 | 46970/47161 | 47042/47233 | 73   | 73   | 100 | N/A       | 96 | 66.09 | N/A   |
| Nad9     | NADH dehydrogenase subunit 9 | NP_066543 | 47070/47267 | 47627/47827 | 588  | 561  | 105 | 5.00E-103 | 75 | N/A   | N/A   |
| Glu tRNA | Glutamic acid tRNA           | NC_002573 | 47662/47858 | 47734/47930 | 73   | 73   | 100 | N/A       | 93 | 54.27 | N/A   |
| Rns      | Small subunit rRNA           | NC_002573 | 47889/48138 | 49451/49716 | 1563 | 1579 | 99  | N/A       | 87 | N/A   | 589.4 |

<sup>1</sup>The accession given for homologues of RNAs is that of the entire *N. gruberi* mitochondrial genome (NC\_002573). Percent identity was calculated with respect to the sequence feature with a corresponding annotation. For protein-coding genes, the accession numbers of the *N. gruberi* homologues are given.

<sup>2</sup>In relation to the *N. gruberi* orthologue.

**Table S3.** Annotation of *N. fowleri* 60-kb segment based on BLAST results

| Possible Gene          | Annotation                            | Length (aa) | <i>N. gruberi</i> hit | % length of <i>Ng</i> hit | E-value   | % Identity | Notes                                         |
|------------------------|---------------------------------------|-------------|-----------------------|---------------------------|-----------|------------|-----------------------------------------------|
| Contig9_1_165_659      | putative                              | 145         | N/A                   | N/A                       | N/A       | N/A        | Not supported by Ng/NR BLASTs                 |
| Contig9_2_1673_2002    | putative                              | 110         | N/A                   | N/A                       | N/A       | N/A        | Not supported by Ng/NR BLASTs                 |
| Contig9_3_2113_2703    | putative                              | 197         | N/A                   | N/A                       | N/A       | N/A        | Contains reverse transcriptase domain         |
| Contig9_4_3139_3870    | Naegleria-specific                    | 244         | XP_002674212          | 44                        | 2.00E-20  | 47         | Contains RNase H superfamily domain           |
| Contig9_5_6233_4411    | Inositol 1,4,5-trisphosphate receptor | 606         | XP_002675052          | 22                        | 0         | 64         | Missing most of protein, frameshift, 1 intron |
| Contig9_6_7742_9509    | Unknown                               | 589         | XP_002675053          | 92                        | 4.00E-71  | 36         | Contains LRRs, one intron                     |
| Contig9_7_10042_11291  | Naegleria-specific                    | 417         | XP_002680747          | 77                        | 1.00E-118 | 56         | Three introns                                 |
| Contig9_8_12703_14563  | Unknown                               | 620         | XP_002674978          | 90                        | 6.00E-157 | 59         | Two introns, contains Vps9 domain             |
| Contig9_9_18345_19483  | Naegleria-specific                    | 1138        | XP_002675151          | 79                        | 1.00E-53  | 27         | One intron                                    |
| Contig9_10_17987_15908 | possible cytosolic                    | 693         | XP_002675072          | 113                       | 0         | 75         | None                                          |

|                        |                    |      |              |     |          |     |                                    |
|------------------------|--------------------|------|--------------|-----|----------|-----|------------------------------------|
|                        | carboxypeptidase 6 |      |              |     |          |     |                                    |
| Contig9_11_22176_22842 | putative           | 666  | N/A          | N/A | N/A      | N/A | Not supported by Ng/NR BLASTs      |
| Contig9_12_23291_24589 | Naegleria-specific | 433  | XP_002675150 | 96  | 3.00E-48 | 43  | None                               |
| Contig9_13_24415_24118 | putative           | 100  | N/A          | N/A | N/A      | N/A | Not supported by Ng/NR BLASTs      |
| Contig9_14_26791_27213 | putative           | 141  | N/A          | N/A | N/A      | N/A | Not supported by Ng/NR BLASTs      |
| Contig9_15_27582_29939 | Naegleria-specific | 734  | XP_002675145 | 92  | 3.00E-46 | 35  | Four introns                       |
| Contig9_16_26041_24938 | Cathepsin B        | 258  | XP_002678773 | 114 | 2.00E-56 | 53  | Four introns                       |
| Contig9_17_30413_30770 | putative           | 136  | N/A          | N/A | N/A      | N/A | Not supported by Ng/NR BLASTs      |
| Contig9_18_37776_33830 | Naegleria-specific | 1313 | XP_002679077 | 115 | 0        | 41  | 3 introns, Possible ser/thr kinase |
| Contig9_19_32550_28611 | putative           | 346  | N/A          | N/A | N/A      | N/A | Not supported by Ng/NR BLASTs      |
| Contig9_20_31356_30170 | Naegleria-specific | 392  | XP_002682536 | 109 | 2.00E-17 | 42  | None                               |
| Contig9_21_37014_37437 | putative           | 141  | N/A          | N/A | N/A      | N/A | Not supported by Ng/NR BLASTs      |

|                        |                                     |      |                    |     |          |     |                                              |
|------------------------|-------------------------------------|------|--------------------|-----|----------|-----|----------------------------------------------|
| Contig9_23_40599_40961 | unknown                             | 121  | N/A                | N/A | N/A      | N/A | None                                         |
| Contig9_24_43494_44097 | unknown                             | 201  | 5453 <sup>1</sup>  | 69  | 2.50E-60 | 84  | Contains Erv1/Alr domain                     |
| Contig9_25_42800_42445 | putative                            | 118  | N/A                | N/A | N/A      | N/A | Not supported by Ng/NR BLASTs                |
| Contig9_26_51515_44333 | ATM (ataxia telangiectasia mutated) | 2394 | XP_002682330       | 109 | 0        | 45  | Ser/thr kinase; cell cycle checkpoint kinase |
| Contig9_27_53454_54366 | Hsp40                               | 304  | XP_002682244       | 100 | 9.00E-89 | 64  | DNAJ and RRM domains                         |
| Contig9_28_53074_52273 | Naegleria-specific                  | 266  | XP_002682329       | 93  | 5.00E-75 | 58  | Two introns                                  |
| Contig9_30_59348_60465 | Naegleria-specific                  | 358  | XP_002675601       | 116 | 3.00E-13 | 25  | low similarity                               |
| Contig9_31_60061_59660 | putative                            | 133  | N/A                | N/A | N/A      | N/A | Not supported by Ng/NR BLASTs                |
| Contig9_32_58903_56581 | ADAP                                | 774  | XP_002675599       | 98  | 0        | 67  | 1 intron, ArfGAP domain, two PH domains      |
| Contig9_33_55908_55399 | unknown                             | 136  | 46060 <sup>1</sup> | 65  | 1.20E-44 | 72  | PUB domain                                   |

<sup>1</sup> Homologue identified in the Joint Genome Institute *N. gruberi* database only.
